# Supplementary material for: Temperature-controlled reduction of Cu(ii) and structural transformation on the assembly of coordination network
Source: Royal Society of Chemistry journal article supplement (doi:10.1039/c2ce00004k), 2012-01-01
Supplement: c2ce00004k.pdf [file c2ce00004k.pdf]

## Supporting information for

### Temperature-controlled reduction of Cu(II) and structural transformation on the assembly of coordination network †

Jie Ma,<sup>ab</sup> Feilong Jiang,<sup>a</sup> Lian Chen,<sup>a</sup> Mingyan Wu,<sup>a</sup> Shuquan Zhang,<sup>ab</sup> Kecai Xiong,<sup>ab</sup>  
Dong Han,<sup>ab</sup> Maochun Hong<sup>\*a</sup>

<sup>a</sup>State Key Laboratory of Structure Chemistry, Fujian Institute of Research on the Structure of Matter, Chinese Academy of Sciences, Fuzhou, 350002, China.

E-mail: [hmc@fjirsm.ac.cn](mailto:hmc@fjirsm.ac.cn).

Tel: +86-591-83712460; Fax: +86-591-83794946.

<sup>b</sup>Graduate School of the Chinese Academy of Sciences, Beijing, 100049, China.

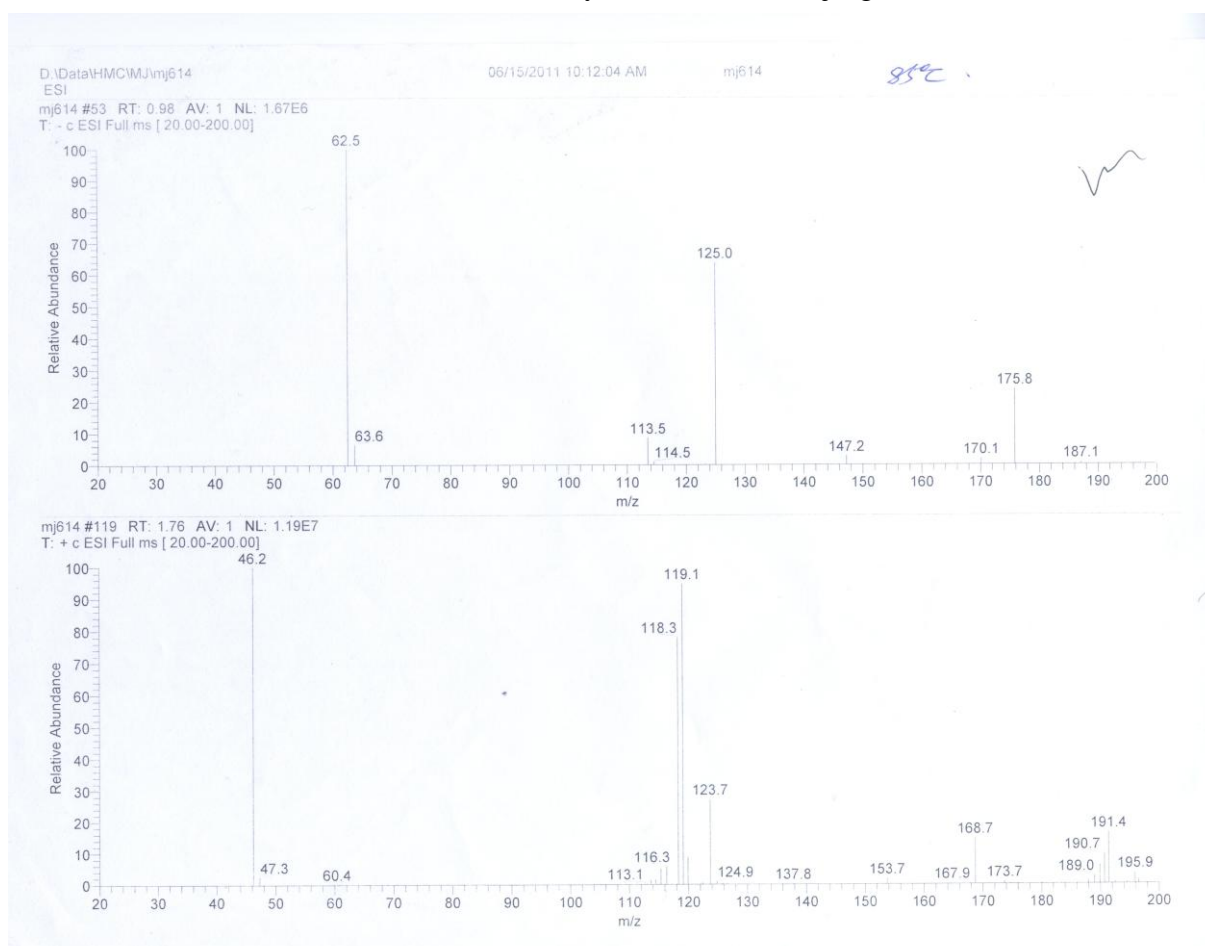

Figure S1. ESI mass spectrum of mother solution of **1**.
